# Supplementary material
Source: HighWire-hosted journal article supplement (https://bmjopen.bmj.com/content/12/3/e057594)
Supplement: inline-supplementary-material-1 [file inline-supplementary-material-1.pdf]

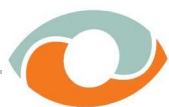

**The Fred Hollows  
Foundation**

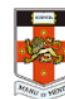

**UNSW  
AUSTRALIA**

## Q.REC Study: Record Forms

### Form A: Baseline USP Data Record Form

This form is to be filled out by the research optometrist / refractionist.

Optometrist or

Refractionist name: .....

USP ID: .....

USP Gender: .....

USP Age: .....

|                                      | Right lens | Left lens |
|--------------------------------------|------------|-----------|
| Sph                                  |            |           |
| Cyl                                  |            |           |
| Axis                                 |            |           |
| Monocular distance VA*               |            |           |
| Binocular distance VA*               |            |           |
| Near addition                        |            |           |
| Monocular near VA*                   |            |           |
| Binocular near VA*                   |            |           |
| Pupillary distance in mm (dist/near) |            |           |

\* Visual acuity (VA) should be in 6/6 or 20/20 format including incomplete lines, e.g. 6/7.5<sup>+2</sup>

With the amount of refractive error, would you prescribe spectacles?

Yes

No

What types of spectacles would be suitable for this USP? (tick all that apply)

Distance

Near

Bifocal

Multifocal / Progressive

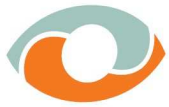

**The Fred Hollows  
Foundation**

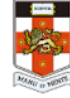

**UNSW  
AUSTRALIA**

## Form B: Post-training Assessment

This form is to be filled out by the research optometrist / refractionist.

1. Conduct a refraction with the USP including a spectacle recommendation *Or* Attend an optical service with a USP to observe.
2. Observe the USP completing the 'Optical service visit checklist' immediately after the visit.

| Checklist                                                                                                                                | Yes,<br>recorded or<br>observed | Additional<br>training<br>needs |
|------------------------------------------------------------------------------------------------------------------------------------------|---------------------------------|---------------------------------|
| Was the USP able to correctly identify and record if focimetry was or was not performed?                                                 |                                 |                                 |
| Was the USP able to correctly identify and record if distance visual acuity was or was not measured?                                     |                                 |                                 |
| Was the USP able to correctly identify and record if pinhole visual acuity was or was not measured?                                      |                                 |                                 |
| Was the USP able to correctly identify and record if near visual acuity was or was not measured?                                         |                                 |                                 |
| Was the USP able to correctly identify and record if retinoscopy was or was not performed?                                               |                                 |                                 |
| Was the USP able to correctly identify and record if auto-refraction was or was not performed?                                           |                                 |                                 |
| Was the USP able to correctly identify and record what type of subjective refraction was or was not performed?                           |                                 |                                 |
| Was the USP able to correctly identify and record if the <i>spherical component</i> of subjective refraction was or was not performed?   |                                 |                                 |
| Was the USP able to correctly identify and record if the <i>cylindrical component</i> of subjective refraction was or was not performed? |                                 |                                 |
| Was the USP able to correctly identify and record if the subjective near refraction was or was not performed?                            |                                 |                                 |
| Was the USP able to correctly identify and record if the pupillary distance was or was not measured?                                     |                                 |                                 |
| Did the USP request a written prescription?                                                                                              |                                 |                                 |
| Did the USP assess the visual acuity chart distance?                                                                                     |                                 |                                 |
| Did the USP stick to the script?                                                                                                         |                                 |                                 |

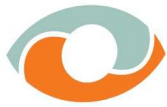

**The Fred Hollows  
Foundation**

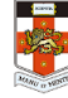

**UNSW  
AUSTRALIA**

## Form C: USP Optical service visit checklist

This form is to be filled out by the USP immediately after each optical service visit.

USP ID: \_\_\_\_\_

Optical Service ID: \_\_\_\_\_

| Q No. | Question                                                                                         | Response (Code)                                                                                                                                                                                                                    | Go to                             |
|-------|--------------------------------------------------------------------------------------------------|------------------------------------------------------------------------------------------------------------------------------------------------------------------------------------------------------------------------------------|-----------------------------------|
| 1     | Do you feel the optical service has identified you as an unannounced standardised patient (USP)? | <input type="checkbox"/> Yes (1)<br><input type="checkbox"/> No (0)<br><input type="checkbox"/> Unsure (88)                                                                                                                        | If yes: Q2<br>If no or unsure: Q4 |
| 2     | When do you think you were identified?                                                           | <input type="checkbox"/> Before the eye test (1)<br><input type="checkbox"/> During the eye test (2)<br><input type="checkbox"/> At the end of the eye test (3)<br><input type="checkbox"/> When I went to pick up the glasses (4) | Q3                                |
| 3     | Why do you think you were or might have been identified as a USP?                                | <i>[Open comment]</i>                                                                                                                                                                                                              | Q4                                |
| 4     | Did you bring your glasses with you?                                                             | <input type="checkbox"/> Yes, I wore them (1)<br><input type="checkbox"/> Yes, I had them with me (2)<br><input type="checkbox"/> No (0)                                                                                           | If yes: Q5<br>If no: Q6           |
| 5     | Did any of the staff perform focimetry on your glasses?                                          | <input type="checkbox"/> Yes (1)<br><input type="checkbox"/> No (0)<br><input type="checkbox"/> Unsure (88)                                                                                                                        | Q6                                |
| 6     | Did the clinician check distance visual acuity before refraction?                                | <input type="checkbox"/> Yes (1)<br><input type="checkbox"/> No (0)<br><input type="checkbox"/> Unsure (88)                                                                                                                        | Q7                                |
| 7     | Did the clinician check distance visual acuity with a pinhole?                                   | <input type="checkbox"/> Yes, (1)<br><input type="checkbox"/> No (0)<br><input type="checkbox"/> Unsure (88)                                                                                                                       | Q8                                |



**The Fred Hollows  
Foundation**

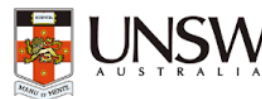

| Q No. | Question                                                                     | Response (Code)                                                                                             | Go to             |
|-------|------------------------------------------------------------------------------|-------------------------------------------------------------------------------------------------------------|-------------------|
| 8     | Did the clinician check near visual acuity at the beginning of the eye test? | <input type="checkbox"/> Yes(1)<br><input type="checkbox"/> No (0)<br><input type="checkbox"/> Unsure (88)  | Q9                |
| 9     | Did the clinician perform auto-refraction?                                   | <input type="checkbox"/> Yes (1)<br><input type="checkbox"/> No (0)<br><input type="checkbox"/> Unsure (88) | Q10               |
| 10    | Did the clinician perform retinoscopy?                                       | <input type="checkbox"/> Yes (1)<br><input type="checkbox"/> No (0)<br><input type="checkbox"/> Unsure (88) | Q11               |
| 11    | Did the clinician perform a distance vision refraction?                      | <input type="checkbox"/> Yes (1)<br><input type="checkbox"/> No (0)<br><input type="checkbox"/> Unsure (88) | Q12<br>If no: Q17 |
| 12    | Did the clinician use a phoropter during the refraction?                     | <input type="checkbox"/> Yes (1)<br><input type="checkbox"/> No (0)<br><input type="checkbox"/> Unsure (88) | Q13               |
| 13    | Did the clinician use a trial frame during the refraction?                   | <input type="checkbox"/> Yes (1)<br><input type="checkbox"/> No (0)<br><input type="checkbox"/> Unsure (88) | Q14               |
| 14    | Did the clinician test the <b>spherical element</b> during the refraction?   | <input type="checkbox"/> Yes (1)<br><input type="checkbox"/> No (0)<br><input type="checkbox"/> Unsure (88) | Q15               |
| 15    | Did the clinician test the <b>cylindrical element</b> during the refraction? | <input type="checkbox"/> Yes (1)<br><input type="checkbox"/> No (0)<br><input type="checkbox"/> Unsure (88) | Q16               |
| 16    | Did the clinician check your near visual acuity with the distance lenses?    | <input type="checkbox"/> Yes (1)<br><input type="checkbox"/> No (0)<br><input type="checkbox"/> Unsure (88) | Q17               |
| 17    | Did the clinician perform a near vision refraction?                          | <input type="checkbox"/> Yes (1)<br><input type="checkbox"/> No (0)<br><input type="checkbox"/> Unsure (88) | Q18               |



**The Fred Hollows  
Foundation**

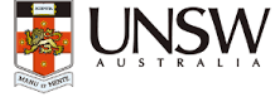

| Q No. | Question                                                                        | Response (Code)                                                                                                                                                                                                                                                                               | Go to                     |
|-------|---------------------------------------------------------------------------------|-----------------------------------------------------------------------------------------------------------------------------------------------------------------------------------------------------------------------------------------------------------------------------------------------|---------------------------|
| 18    | Did the clinician recommend new glasses?                                        | <input type="checkbox"/> Yes (1)<br><input type="checkbox"/> No (0)<br><input type="checkbox"/> Unsure (88)                                                                                                                                                                                   | If yes: Q19<br>If no: Q22 |
| 19    | Why did the clinician say you need new glasses?                                 | <input type="checkbox"/> My prescription has changed a lot (1)<br><input type="checkbox"/> My current glasses are poor quality (2)<br><input type="checkbox"/> No reason provided (3)<br><input type="checkbox"/> Other. Please describe (4)<br>_____<br><input type="checkbox"/> Unsure (88) | Q20                       |
| 20    | What type of glasses were you recommended?<br>(select all that apply)           | <input type="checkbox"/> Distance only (1)<br><input type="checkbox"/> Near only (2)<br><input type="checkbox"/> Both distance and near as separate glasses (3)<br><input type="checkbox"/> Bifocals (4)<br><input type="checkbox"/> Multifocals (5)<br><input type="checkbox"/> Unsure (88)  | Q21                       |
| 21    | Did any of the staff measure pupil distance?                                    | <input type="checkbox"/> Yes (1)<br><input type="checkbox"/> No (0)<br><input type="checkbox"/> Unsure (88)                                                                                                                                                                                   | Q23                       |
| 22    | Why did the clinician say you DO NOT need new glasses?                          | <input type="checkbox"/> My prescription has not changed, my current glasses are still good (1)<br><input type="checkbox"/> I do not need to wear glasses (2)<br><input type="checkbox"/> No reason was provided. (3)<br><input type="checkbox"/> Unsure (88)                                 | Q23                       |
| 23    | Did the clinician recommend a referral to secondary/tertiary eye care services? | <input type="checkbox"/> Yes (1)<br><input type="checkbox"/> No (0)<br><input type="checkbox"/> Unsure (88)                                                                                                                                                                                   | Q24                       |
| 24    | Did the clinician recommend a follow up eye examination?                        | <input type="checkbox"/> Yes (1)<br><input type="checkbox"/> No (0)<br><input type="checkbox"/> Unsure (88)                                                                                                                                                                                   | Q25                       |
| 25    | Did the clinician and staff members communicate to you clearly:                 |                                                                                                                                                                                                                                                                                               |                           |



**The Fred Hollows  
Foundation**



**UNSW  
AUSTRALIA**

| Q No. | Question                                                                                     | Response (Code)                                                                                                                                                                                                                                                                                                                                                                                                                                                                                                                                                                                                                                             | Go to |
|-------|----------------------------------------------------------------------------------------------|-------------------------------------------------------------------------------------------------------------------------------------------------------------------------------------------------------------------------------------------------------------------------------------------------------------------------------------------------------------------------------------------------------------------------------------------------------------------------------------------------------------------------------------------------------------------------------------------------------------------------------------------------------------|-------|
| 25a   | -During the eye test                                                                         | <input type="checkbox"/> Yes (1)<br><input type="checkbox"/> No (0)<br><input type="checkbox"/> Unsure (88)                                                                                                                                                                                                                                                                                                                                                                                                                                                                                                                                                 | Q25b  |
| 25b   | -With the outcomes of the eye test                                                           | <input type="checkbox"/> Yes (1)<br><input type="checkbox"/> No (0)<br><input type="checkbox"/> Unsure (88)                                                                                                                                                                                                                                                                                                                                                                                                                                                                                                                                                 | Q25c  |
| 25c   | -When explaining which glasses (lenses or frames) you need OR why you don't need new glasses | <input type="checkbox"/> Yes (1)<br><input type="checkbox"/> No (0)<br><input type="checkbox"/> Unsure (88)                                                                                                                                                                                                                                                                                                                                                                                                                                                                                                                                                 | Q26   |
| 26    | Gender of clinician                                                                          | <input type="checkbox"/> Female (1)<br><input type="checkbox"/> Male (2)<br><input type="checkbox"/> Unsure (88)                                                                                                                                                                                                                                                                                                                                                                                                                                                                                                                                            | Q27   |
| 27    | Were there any qualifications or registration certificate(s) observed in the store?          | <input type="checkbox"/> Yes (1)<br><input type="checkbox"/> No (0)<br><input type="checkbox"/> Unsure (88)                                                                                                                                                                                                                                                                                                                                                                                                                                                                                                                                                 | Q28   |
| 28    | What type of distance visual acuity chart was used?                                          | <input type="checkbox"/> Paper chart directly in front of me (1)<br><input type="checkbox"/> Paper chart placed behind me but could be seen in the mirror in front of me (2)<br><input type="checkbox"/> Internally lit chart in front of me (3)<br><input type="checkbox"/> Internally lit chart placed behind me but could be seen in the mirror in front of me (4)<br><input type="checkbox"/> Computer chart in front of me (5)<br><input type="checkbox"/> Computer chart placed behind me but could be seen in the mirror in front of me (6)<br><input type="checkbox"/> Other. Please describe: (7)<br>_____<br><input type="checkbox"/> Unsure (88) | Q29   |

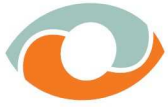

**The Fred Hollows  
Foundation**

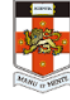

**UNSW**  
AUSTRALIA

| Q No. | Question                                                                            | Response (Code)   | Go to    |
|-------|-------------------------------------------------------------------------------------|-------------------|----------|
| 29    | What was the approximate distance between you and the distance visual acuity chart? | _____ (in metres) | Complete |

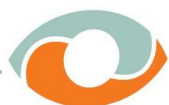

**The Fred Hollows  
Foundation**

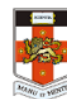

**UNSW  
AUSTRALIA**

## Form D: Assessment of Spectacles/Glasses

This form is to be filled out by the research optometrist / refractionist.

USP ID: \_\_\_\_\_ Optical Service ID: \_\_\_\_\_

Type of spectacles:

- Distance  
 Near  
 Bifocal  
 Multifocal

Visual acuity (6/6 or 20/20 format including incomplete lines, e.g. 6/7.5<sup>+2</sup>)

|          | Right eye | Left eye | Both eyes |
|----------|-----------|----------|-----------|
| Distance |           |          |           |
| Near     |           |          |           |

Near viewing distance (in cm): : \_\_\_\_\_

With the spectacles, does the USP experience any eye strain or discomfort with:

|                 |                                                                                                                   |
|-----------------|-------------------------------------------------------------------------------------------------------------------|
| Distance vision | <input type="checkbox"/> Yes<br><input type="checkbox"/> No<br><input type="checkbox"/> NA (near spectacles only) |
| Near vision     | <input type="checkbox"/> Yes<br><input type="checkbox"/> No                                                       |

### Focimetry

|                                          | Right lens | Left lens |
|------------------------------------------|------------|-----------|
| Sph                                      |            |           |
| Cyl                                      |            |           |
| Axis                                     |            |           |
| Near addition                            |            |           |
| Vertical prism ( $\Delta$ and direction) |            |           |

|                               | Distance prescription | Near prescription |
|-------------------------------|-----------------------|-------------------|
| Lens centration distance (mm) |                       |                   |



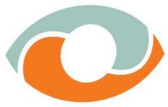

**The Fred Hollows  
Foundation**



**UNSW  
AUSTRALIA**

Written prescription (can be scanned and uploaded to database)

|                                            | Right lens | Left lens |
|--------------------------------------------|------------|-----------|
| Sph                                        |            |           |
| Cyl                                        |            |           |
| Axis                                       |            |           |
| Near addition                              |            |           |
| Horizontal prism ( $\Delta$ and direction) |            |           |
| Vertical prism ( $\Delta$ and direction)   |            |           |

|                     | Distance | Near |
|---------------------|----------|------|
| Pupil distance (mm) |          |      |

Additional notes (e.g. specifying lens type): \_\_\_\_\_

Does the written prescription have any information about the optical services' registration?

- Yes – a registration number  
 Yes – other indication Please describe: \_\_\_\_\_  
 No  
 Unsure
